# Supplementary material
Source: PubMed Central journal article supplement (PMC4194150)
Supplement: NIHMS578796-supplement-supplement_1.pdf [file NIHMS578796-supplement-supplement_1.pdf]

Online Table 1. Conventional Echocardiographic Parameters and Speckle Tracking Echocardiographic Parameters at the Year-25 Examination

| Variable                              | n     | Mean $\pm$ SD    |
|---------------------------------------|-------|------------------|
| <b>Conventional Echocardiography</b>  |       |                  |
| LV ejection fraction, %               | 3,023 | 61.3 $\pm$ 7.2   |
| LV end-diastolic volume, ml           | 3,024 | 112.1 $\pm$ 30.2 |
| LV end-diastolic volume/height, ml/m  | 3,024 | 65.4 $\pm$ 16.1  |
| LV end-systolic volume, ml            | 3,023 | 44.0 $\pm$ 18.1  |
| LV end-systolic volume/height, ml/m   | 3,023 | 25.7 $\pm$ 10.0  |
| LV stroke volume, ml                  | 3,023 | 68.1 $\pm$ 17.1  |
| LV stroke volume /height, ml/m        | 3,023 | 39.8 $\pm$ 9.2   |
| Posterior wall thickness, mm          | 2,937 | 8.9 $\pm$ 1.7    |
| Interventricular septum thickness, mm | 2,939 | 9.1 $\pm$ 1.7    |
| LV mass, g                            | 2,935 | 168.1 $\pm$ 52.4 |
| LV mass/height, g/m                   | 2,935 | 98.4 $\pm$ 29.0  |
| Relative wall thickness               | 2,931 | 0.35 $\pm$ 0.07  |
| LV mass/LV end-diastolic volume ratio | 2,763 | 1.56 $\pm$ 0.49  |
| E, cm/s                               | 3,214 | 78.8 $\pm$ 16.0  |
| A, cm/s                               | 3,214 | 63.7 $\pm$ 16.5  |
| E/A ratio                             | 3,214 | 1.30 $\pm$ 0.36  |
| Deceleration time, ms                 | 3,200 | 178 $\pm$ 39.6   |
| Isovolumic relaxation time, ms        | 3,226 | 73.7 $\pm$ 9.3   |
| Left atrium volume, ml                | 3,226 | 49.7 $\pm$ 15.9  |
| Left atrium volume/height, ml/m       | 3,226 | 29.1 $\pm$ 9.0   |
| e', cm/s                              | 3,202 | 10.5 $\pm$ 2.3   |

|                                          |       |               |
|------------------------------------------|-------|---------------|
| E/e' ratio                               | 3,178 | 7.8 ± 2.3     |
| <b>Speckle Tracking Echocardiography</b> |       |               |
| EII, %                                   | 2,855 | -15.11 ± 2.43 |
| Ecc, %                                   | 2,914 | -15.32 ± 2.81 |
| EII_SRs, sec <sup>-1</sup>               | 2,855 | -0.66 ± 0.12  |
| Ecc_SRs, sec <sup>-1</sup>               | 2,914 | -0.69 ± 0.15  |
| EII_SRe, sec <sup>-1</sup>               | 2,843 | 0.82 ± 0.25   |
| Ecc_SRe, sec <sup>-1</sup>               | 2,909 | 0.80 ± 0.32   |

---

LV end-diastolic volume, LV end-systolic volume, LV stroke volume, Left atrium volume, and LV mass were indexed to body height (m).

A = late peak diastolic mitral flow velocity; E = early peak diastolic mitral velocity; e' = peak early diastolic mitral annular velocity; E/A = early to late peak diastolic mitral flow velocity ratio; Ecc = circumferential peak systolic strain; Ecc\_SRe = circumferential peak early diastolic strain rate; Ecc\_SRs = circumferential peak systolic strain rate; E/e' = ratio of early peak diastolic mitral velocity/peak early diastolic mitral annular velocity; EII = longitudinal peak systolic strain; EII\_SRe = longitudinal peak early diastolic strain rate; EII\_SRs = longitudinal peak systolic strain rate; LV = left ventricular.

Online Table 2. Cross-Sectional Relationships of BMI to LV Structural and Functional Indices at Year-25

| Conventional/STE parameters             |       | Year-25 BMI (kg/m <sup>2</sup> ) |                             |                        |                            |
|-----------------------------------------|-------|----------------------------------|-----------------------------|------------------------|----------------------------|
| Structural indices                      | n     | r                                | Unadjusted                  | partial r <sup>¶</sup> | Multiple                   |
|                                         |       |                                  | $\beta$ -coefficients (SE)  |                        | regression <sup>‡</sup>    |
| LV end-diastolic volume/height, ml/m    | 3,024 | 0.26                             | 0.61 (0.04) <sup>§</sup>    | 0.28                   | 0.69 (0.04) <sup>§</sup>   |
| LV end-systolic volume/height, ml/m     | 3,023 | 0.18                             | 0.27 (0.03) <sup>§</sup>    | 0.18                   | 0.29 (0.03) <sup>§</sup>   |
| LV stroke volume /height, ml/m          | 3,023 | 0.25                             | 0.34 (0.02) <sup>§</sup>    | 0.28                   | 0.40 (0.03) <sup>§</sup>   |
| LV mass/height, g/m                     | 2,935 | 0.45                             | 1.90 (0.07) <sup>§</sup>    | 0.40                   | 1.74 (0.07) <sup>§</sup>   |
| LV mass/ LV end-diastolic volume ratio* | 2,763 | 0.22                             | 2.00 (0.10) <sup>§</sup>    | 0.14                   | 1.00 (0.20) <sup>§</sup>   |
| Systolic functional indices             | n     | r                                | Unadjusted                  | partial r <sup>¶</sup> | Multiple                   |
|                                         |       |                                  | $\beta$ -coefficients (SE)  |                        | regression <sup>‡</sup>    |
| LV ejection fraction, %                 | 3,023 | -0.03                            | -0.03 (0.02)                | -0.02                  | -0.03 (0.02)               |
| EII, %                                  | 2,855 | 0.20                             | 0.07 (0.01) <sup>§</sup>    | 0.08                   | 0.03 (0.01) <sup>§</sup>   |
| Ecc, %                                  | 2,914 | 0.09                             | 0.04 (0.01) <sup>§</sup>    | 0.04                   | 0.02 (0.01) <sup>†</sup>   |
| Diastolic functional indices            | n     | r                                | Unadjusted                  | partial r <sup>¶</sup> | Multiple                   |
|                                         |       |                                  | $\beta$ -coefficients (SE)  |                        | regression <sup>‡</sup>    |
| E/A ratio                               | 3,214 | -0.22                            | -0.01 (0.001) <sup>§</sup>  | -0.11                  | -0.01 (0.001) <sup>§</sup> |
| e', cm/s                                | 3,202 | -0.23                            | -0.08 (0.01) <sup>§</sup>   | -0.09                  | -0.03 (0.01) <sup>§</sup>  |
| E/e' ratio                              | 3,178 | 0.25                             | 0.08 (0.01) <sup>§</sup>    | 0.10                   | 0.03 (0.01) <sup>§</sup>   |
| Left atrium volume/height, ml/m         | 3,226 | 0.38                             | 0.49 (0.02) <sup>§</sup>    | 0.36                   | 0.52 (0.02) <sup>§</sup>   |
| EII_SRe, sec <sup>-1</sup>              | 2,843 | -0.10                            | -0.004 (0.001) <sup>§</sup> | -0.03                  | -0.001 (0.001)             |

|                            |       |       |                 |       |                |
|----------------------------|-------|-------|-----------------|-------|----------------|
| Ecc_SRe, sec <sup>-1</sup> | 2,909 | -0.05 | -0.002 (0.001)† | -0.02 | -0.001 (0.001) |
|----------------------------|-------|-------|-----------------|-------|----------------|

\*LV mass/ LV end-diastolic volume ratio was multiplied by 100.

†p < 0.05; ‡p < 0.01; §p < 0.001

∫Year-25 BMI was adjusted for Year-25 age, sex, race + diabetes, systolic blood pressure, heart rate, total cholesterol, high-density lipoprotein cholesterol, alcohol consumption/day, activity level, use of anti-hypertensive medications, educational level, and number of cigarettes/day.

¶Partial r is the square root of the partial r<sup>2</sup> in the multiple regression models, corresponding to the β-coefficient.

LV end-diastolic volume, LV end-systolic volume, LV stroke volume, Left atrium volume, and LV mass were indexed to body height (m).

BMI = body mass index; e' = peak early diastolic mitral annular velocity; E/A= early to late peak diastolic mitral flow velocity ratio; E/e' = ratio of early peak diastolic mitral velocity/peak early diastolic mitral annular velocity; Ell = longitudinal peak systolic strain; Ecc = circumferential peak systolic strain; Ell\_SRe = longitudinal peak early diastolic strain rate; Ecc\_SRe = circumferential peak early diastolic strain rate; LV = left ventricular; SE = standard error; STE = speckle tracking echocardiography.

Online Table 3. Relationship of Year-0 BMI and Year-25 BMI to Year-25 LV Structural and Functional Indices

| Conventional/STE Parameters             | Year-0 BMI (kg/m <sup>2</sup> ) |                        |                     | Year-25 BMI (kg/m <sup>2</sup> ) |                     |
|-----------------------------------------|---------------------------------|------------------------|---------------------|----------------------------------|---------------------|
|                                         | n                               | partial r <sup>¶</sup> | β-coefficients (SE) | partial r <sup>¶</sup>           | β-coefficients (SE) |
| <b>Structural indices</b>               |                                 |                        |                     |                                  |                     |
| LV end-diastolic volume/height, ml/m    | 3,024                           | 0.09                   | 0.44 (0.09)§        | 0.14                             | 0.47 (0.06)§        |
| LV end-systolic volume/height, ml/m     | 3,023                           | 0.09                   | 0.29 (0.06)§        | 0.07                             | 0.15 (0.04)§        |
| LV stroke volume /height, ml/m          | 3,023                           | 0.05                   | 0.15 (0.05)‡        | 0.17                             | 0.32 (0.03)§        |
| LV mass/height, g/m                     | 2,935                           | 0.12                   | 0.95 (0.15)§        | 0.23                             | 1.26 (0.10)§        |
| LV mass/ LV end-diastolic volume ratio* | 2,763                           | 0.04                   | 1.00 (0.30)         | 0.08                             | 1.00 (0.20)§        |
| <b>Systolic functional indices</b>      | n                               | partial r <sup>¶</sup> | β-coefficients (SE) | partial r <sup>¶</sup>           | β-coefficients (SE) |
| LV ejection fraction, %                 | 3,023                           | -0.05                  | -0.11 (0.04)†       | 0.02                             | 0.03 (0.03)         |
| Ell, %                                  | 2,855                           | 0.0001                 | 0.0001 (0.014)      | 0.06                             | 0.033 (0.010) ‡     |
| Ecc, %                                  | 2,914                           | 0.05                   | 0.04 (0.017)†       | -0.004                           | -0.002 (0.012)      |
| <b>Diastolic functional indices</b>     | n                               | partial r <sup>¶</sup> | β-coefficients (SE) | partial r <sup>¶</sup>           | β-coefficients (SE) |
| E/A ratio                               | 3,214                           | -0.04                  | -0.004 (0.002)†     | -0.06                            | -0.004 (0.001)‡     |
| e', cm/s                                | 3,202                           | -0.03                  | -0.02 (0.01)        | -0.05                            | -0.02 (0.01)‡       |
| E/e' ratio                              | 3,178                           | -0.002                 | -0.002 (0.012)      | 0.07                             | 0.04 (0.008)§       |
| Left atrium volume/height, ml/m         | 3,226                           | 0.09                   | 0.25 (0.05)§        | 0.21                             | 0.39 (0.03)§        |
| Ell_SRe, sec <sup>-1</sup>              | 2,843                           | -0.04                  | -0.003 (0.002)†     | 0.009                            | 0.001 (0.001)       |
| Ecc_SRe, sec <sup>-1</sup>              | 2,909                           | -0.068                 | -0.007 (0.002)§     | 0.029                            | 0.002 (0.001)       |

\* LV mass/ LV end-diastolic volume ratio was multiplied by 100.

†p < 0.05; ‡p < 0.01; §p < 0.001

LV end-diastolic volume, LV end-systolic volume, LV stroke volume, Left atrium volume, and LV mass were indexed to body height (m).

¶Partial  $r$  is the square root of the partial  $r^2$  in the multiple regression models, corresponding to the  $\beta$ -coefficient.

Model: Both Year-0 BMI and Year-25 BMI were included as covariates and were adjusted for baseline age, sex, race + both Year-0 and 25 years change in diabetes, systolic blood pressure, heart rate, total cholesterol, high-density lipoprotein cholesterol, alcohol consumption/day, activity level, use of anti-hypertensive medications, educational level, and number of cigarettes/day.

Abbreviations are the same as in Online Table 2.

Online Table 4. Relationship between change in BMI from young adulthood to middle age and Year-25

LV Structural and Functional Indices

:  $\beta$ -coefficients represent the difference between the group listed and the Low-Low group after adjustment for co-variates structural and functional Indices

| <b>Conventional/STE Parameters</b>      |       | High-High (n=338)          | Low-High (n=1,068)         | High-Low (n=23)            |
|-----------------------------------------|-------|----------------------------|----------------------------|----------------------------|
| <b>Structural indices</b>               | n     | $\beta$ -coefficients (SE) | $\beta$ -coefficients (SE) | $\beta$ -coefficients (SE) |
| LV end-diastolic volume/height, ml/m    | 3,024 | 10.61 (1.03)§              | 5.73 (0.62)§               | 7.94 (3.06)‡               |
| LV end-systolic volume/height, ml/m     | 3,023 | 4.94 (0.67)§               | 2.12 (0.40)§               | 3.60 (2.01)                |
| LV stroke volume /height, ml/m          | 3,023 | 5.64 (0.60)§               | 3.59 (0.36)§               | 4.31 (1.78)†               |
| LV mass/height, g/m                     | 2,935 | 27.99 (1.76)§              | 13.95 (1.04)§              | 26.58 (5.47)§              |
| LV mass/ LV end-diastolic volume ratio* | 2,763 | 20.94 (3.78)§              | 10.16 (2.19)§              | 23.44 (11.10)†             |
| <b>Systolic functional indices</b>      | n     | $\beta$ -coefficients (SE) | $\beta$ -coefficients (SE) | $\beta$ -coefficients (SE) |
| LV ejection fraction, %                 | 3,023 | -0.80 (0.51)               | 0.06 (0.31)                | -0.17 (1.53)               |
| Ell, %                                  | 2,855 | 0.75 (0.166)§              | 0.45 (0.100)§              | -0.01 (0.495)              |
| Ecc, %                                  | 2,914 | 0.32 (0.204)               | 0.12 (0.122)               | 0.22 (0.625)               |
| <b>Diastolic functional indices</b>     | n     | $\beta$ -coefficients (SE) | $\beta$ -coefficients (SE) | $\beta$ -coefficients (SE) |
| E/A ratio                               | 3,214 | -0.11 (0.022)§             | -0.06 (0.014)§             | -0.12 (0.069)              |
| e', cm/s                                | 3,202 | -0.66 (0.139)§             | -0.51 (0.085)§             | -1.20 (0.440)‡             |
| E/e' ratio                              | 3,178 | 0.54 (0.142)§              | 0.57 (0.088)§              | 2.13 (0.449)§              |
| Left atrium volume/height, ml/m         | 3,226 | 8.29 (0.56)§               | 4.64 (0.35)§               | 2.12 (1.78)§               |
| Ell_SRe, sec <sup>-1</sup>              | 2,843 | -0.03 (0.018)              | -0.01 (0.011)              | -0.08 (0.054)              |
| Ecc_SRe, sec <sup>-1</sup>              | 2,909 | -0.04 (0.024)              | -0.005 (0.014)             | -0.117 (0.073)             |

\*LV mass/LV end-diastolic volume ratio was multiplied by 100.

† $p < 0.05$ ; ‡ $p < 0.01$ ; § $p < 0.001$ : vs. Low-Low ( $n = 1,836$ ) as the reference among four BMI groups.

LV end-diastolic volume, LV end-systolic volume, LV stroke volume, Left atrium volume, and LV mass were indexed to body height (m).

High-High = Year-0 BMI  $\geq 30$  and Year-25BMI  $\geq 30$ ; High-Low = Year-0 BMI  $\geq 30$  and Year-25BMI  $< 30$ ; Low-High = Year-0 BMI  $< 30$  and Year-25BMI  $\geq 30$ .

Model: Categorical BMI groups were included as covariates and were adjusted for baseline age, sex, race + both Year-0 and 25 year change in diabetes, systolic blood pressure, heart rate, total-cholesterol, high-density lipoprotein cholesterol, alcohol consumption/day, activity level, use of anti-hypertensive medication, educational level, and number of cigarettes/day.

Abbreviations are the same as in Online Table 2.
